# Supplementary material for: Facile Synthesizing Yolk-Shelled Fe3O4@Carbon Nanocavities with Balanced Physiochemical Synergism as Efficient Hosts for High-Performance Lithium–Sulfur Batteries
Source: MDPI journal article supplement (doi:10.3390/batteries9060295), 2023-05-29
Supplement: s1 [file s1]

**Supplementary material**

**Facile Synthesizing Yolk–shelled  $\text{Fe}_3\text{O}_4$ @carbon  
Nanocavities with Balanced Physiochemical  
Synergism as Efficient Hosts for High-  
performance Lithium–sulfur Batteries**

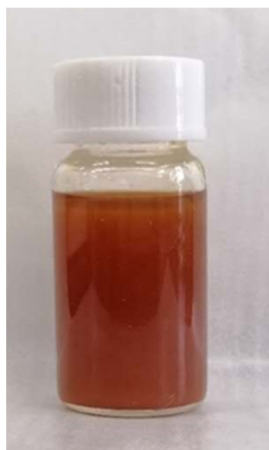

**Figure S1.** The optical photograph of Fe-BTC gel.

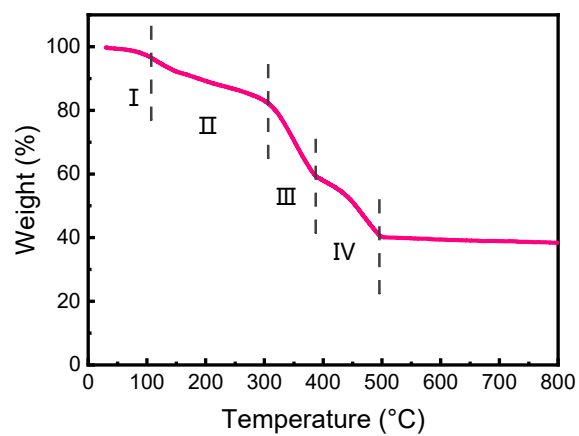

**Figure S2.** TGA curve of Fe-BTC aerogel acquired in a nitrogen atmosphere.

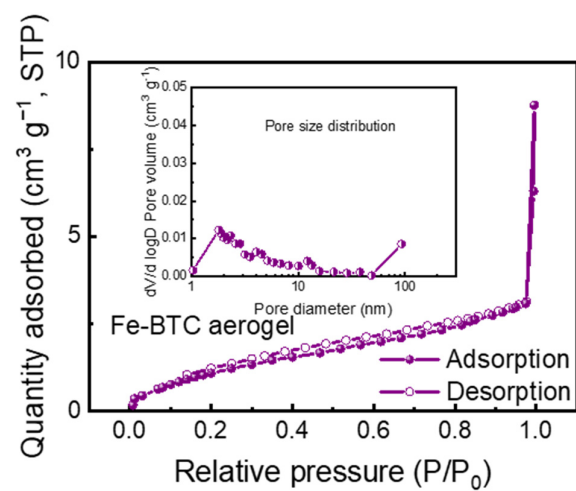

**Figure S3.** Nitrogen adsorption/desorption isotherm of Fe-BTC aerogel with an inset showing the corresponding size distribution of pores.

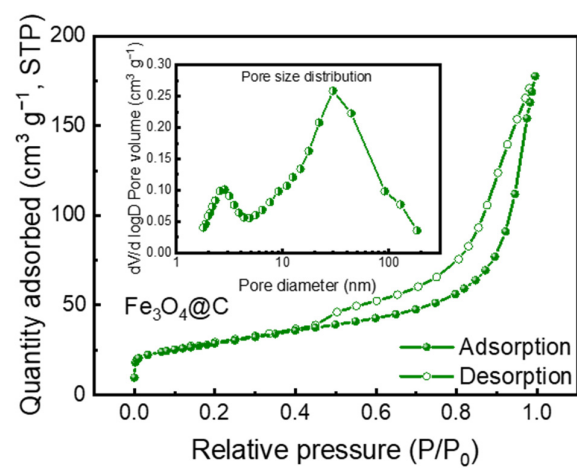

**Figure S4.** Nitrogen adsorption/desorption isotherm of  $\text{Fe}_3\text{O}_4@\text{C}$  with an inset showing the corresponding size distribution of pores.

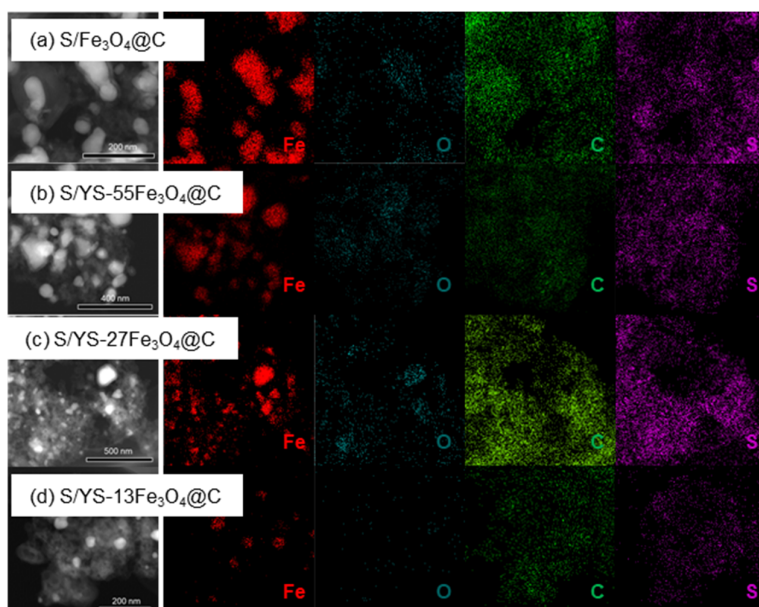

**Figure S5.** EDS elemental mapping images of (a) S/Fe<sub>3</sub>O<sub>4</sub>@C, (b) S/YS-55Fe<sub>3</sub>O<sub>4</sub>@C, (c) S/YS-27Fe<sub>3</sub>O<sub>4</sub>@C, and (d) S/YS-13Fe<sub>3</sub>O<sub>4</sub>@C.

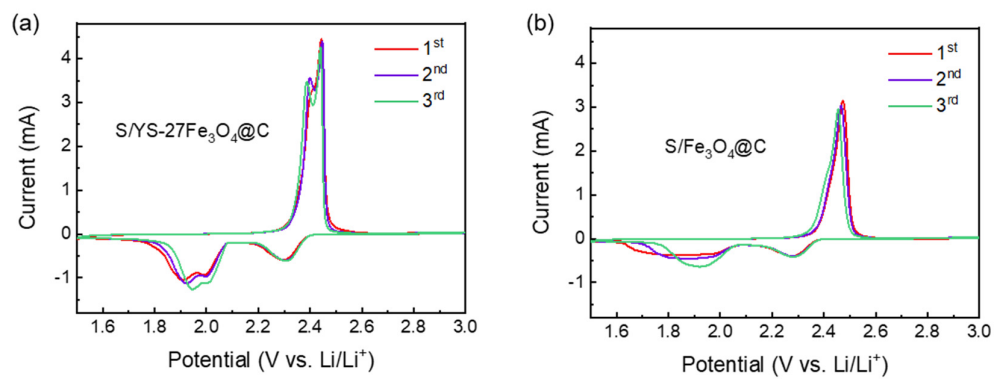

**Figure S6.** CV curves of (a) S/YS-27Fe<sub>3</sub>O<sub>4</sub>@C and (b) S/Fe<sub>3</sub>O<sub>4</sub>@C at 0.1 mV s<sup>-1</sup> for different cycles.

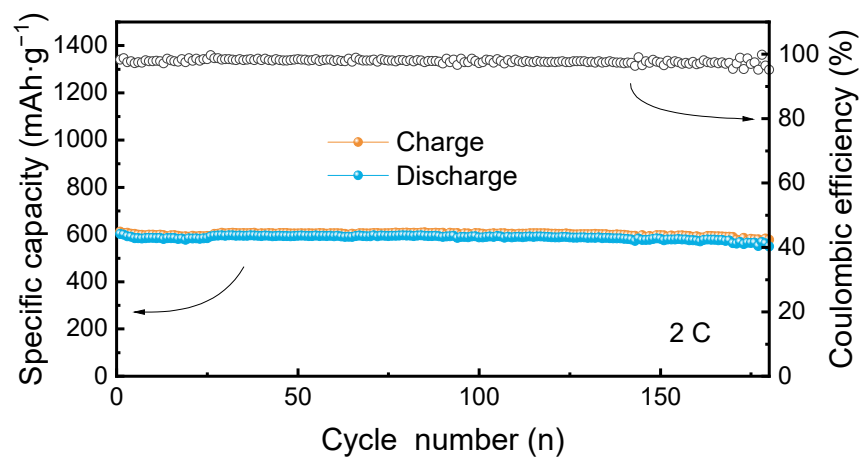

**Figure S7.** Long-term cycling stability of S/YS-27Fe<sub>3</sub>O<sub>4</sub>@C electrode at 2 C.



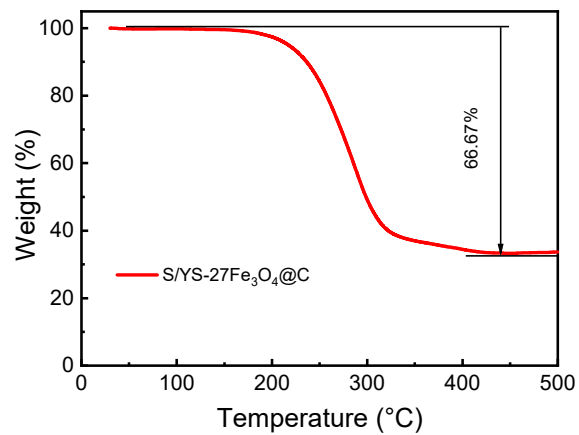

**Figure S8.** TGA curves of S/YS-27Fe<sub>3</sub>O<sub>4</sub>@C in N<sub>2</sub>.

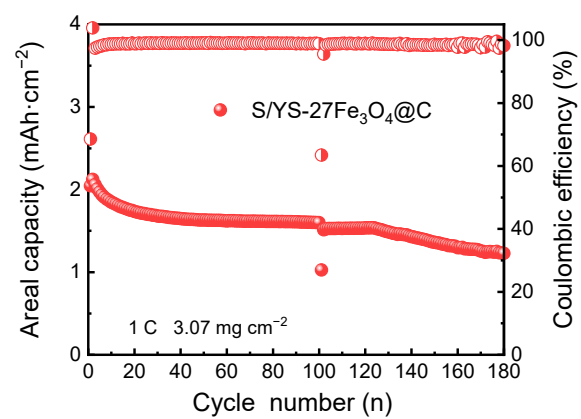

Figure S9. Cycle performance at 1 C of S/YS-27Fe<sub>3</sub>O<sub>4</sub>@C under high sulfur loadings.

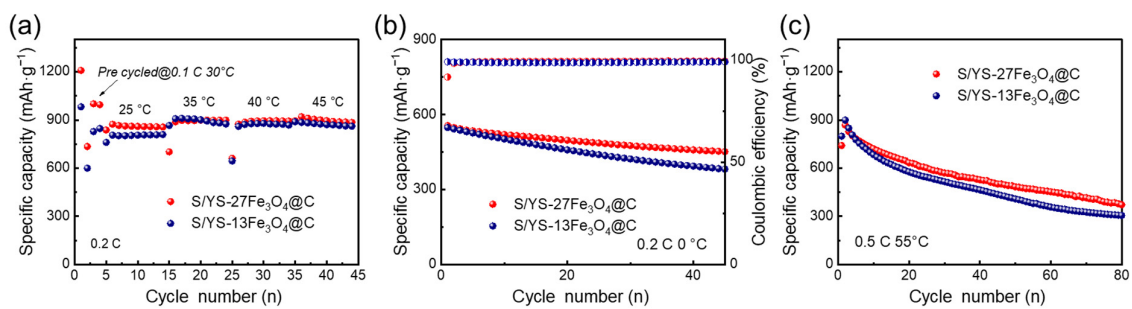

**Figure S10.** Cycle performance of S/YS-27Fe<sub>3</sub>O<sub>4</sub>@C and S/YS-13Fe<sub>3</sub>O<sub>4</sub>@C cathode with a wide temperature range: (a) 25 – 45 °C, (b) 0 °C, (c) 55 °C.

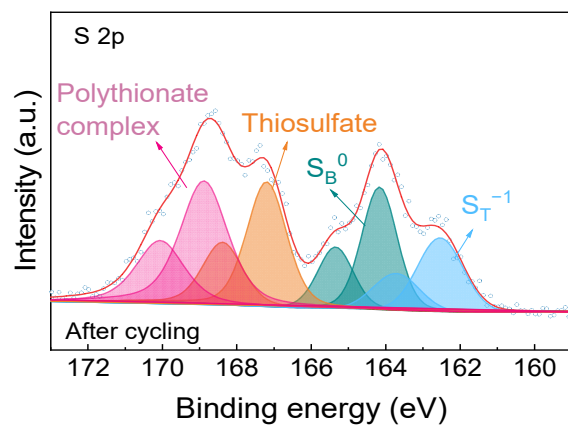

Figure S11. S 2p in S/YS-27Fe<sub>3</sub>O<sub>4</sub>@C after cycling.

**Table S1.** Pore structure parameters of Fe-BTC aerogel and Fe<sub>3</sub>O<sub>4</sub>@C.

|                                   | <b>Specific<br/>surface area<br/>(m<sup>2</sup> g<sup>-1</sup>)</b> | <b>Average pore<br/>diameter (nm)</b> | <b>Pore volume<br/>(cm<sup>3</sup> g<sup>-1</sup>)</b> |
|-----------------------------------|---------------------------------------------------------------------|---------------------------------------|--------------------------------------------------------|
| Fe-BTC<br>aerogel                 | 36.1859                                                             | 2.16362                               | 0.019573                                               |
| Fe <sub>3</sub> O <sub>4</sub> @C | 99.3583                                                             | 7.37165                               | 0.183109                                               |
